# Supplementary material for: Speleothem evidence for Late Miocene extreme Arctic amplification – an analogue for near-future anthropogenic climate change?
Source: Copernicus journal article supplement (doi:10.5194/cp-21-1533-2025), 2025-09-08
Supplement: Supplementary file 1 [file cp-21-1533-2025-supplement.zip]

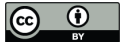

*Supplement of*

**Speleothem evidence for Late Miocene extreme Arctic amplification – an analogue for near-future anthropogenic climate change?**

**Stuart Umbo et al.**

*Correspondence to:* Stuart Umbo ([stuart.umbo@northumbria.ac.uk](mailto:stuart.umbo@northumbria.ac.uk))

- [cp-21-1533-2025-supplement-title-page.pdf](#)
- [Umbo et al Supplementary tables 1-10.xlsx](#)
- [supplement.pdf](#)

The copyright of individual parts of the supplement might differ from the article licence.
